# Supplementary material
Source: publisher site journal article supplement (https://www.dovepress.com/article/310756)
Supplement: Supplementary file 1 [file get_supplementary_file.php]

# Supplementary File.

## Supplementary methods

**Whole genome sequencing and data analysis**

Genomic DNA from the peripheral blood was sheared by a Covaris S220 sonicator (Covaris, Woburn, MA, USA), ligated to paired-end adapters (Illumina, San Diego, California, USA), and amplified by ligation-mediated polymerase chain reaction (LM-PCR), and on an Illumina HiSeq X10 platform (Illumina, San Diego, California, USA), at the coverage depth of 3×. Briefly, crude sequencing data were checked for quality control by FastQC v0.11.2 (http://www.bioinformatics.babraham.ac.uk/projects/fastqc/) and then trimmed by Trimmomatic v0.30 to exclude unqualified reads. The resulting clean reads were aligned to NCBI build GRCh37/ hg19 by Burrows-Wheeler Aligner (BWA) v0.7.17, deduplicated (Picard v1.110) with local realignment (Genome Analysis Toolkit (GATK) v4.3). Variants were called using HaplotypeCaller, annotated by VariantAnnotator by dbSNP138 and results as VCF format were used to perform pre-phasing by SHAPEIT (v2.904) that is an accurate method for estimation of haplotypes, and then imputation by impute2 (version 2). All variants imputed were then converted to bed format by PLINK (v2.00 alpha). In the above analysis steps, PLINK2 was used to check the quality of the sample batches first. The first step is to calculate the missing call rates for each SNP and for each sample. --geno filters out all variants with missing call rates exceeding the provided value (default 0.3) to be removed. Then, --hwe filters out all variants which have Hardy-Weinberg equilibrium exact test p-value below the provided threshold. (0.0001). For filtered variants, Annovar software was utilized for annotation of all tested variants. Gene-based and filter-based methods embedded in ANNOVAR were used. Databases, such as refGene (hg19), dbNSFP(v35c), dbSCSNV(v11), clinvar, COSMIC, intervar, revel, phastConsElements46way, TFBSConsSites, etc., were all considered for variants annotaton. Finally, we selected variants according to mined biological functions or regions and validated these variants in individual cohort.

Using a basic filtering option, such as nonsynonymous SNP or frameshift indels and gene regions (protein coding regions, exons), we selected 9,991 SNVs involved with 5,530 genes. Then, we annotated these SNVs with gnomAD, ExAC, ESP Database, and selected 9,133 candidate SNVs with MAF>=0.01 in an Asian cohort, including 1,876 (20.5%) heterozygotes and 7,257 (79.4%) homozygotes. We referred to de novo mining of deleterious or pathogenic SNVs related to the patient symptoms. Screening SNVs with pathogenic or likely benign status in InterVar, we got 55 SNVs (44 genes), and annotated genes in Reactome Pathway Database (Supplementary Table S1). Meanwhile, for other uncertain SNVs, we found 133 genes are related to the pathways (Supplementary Table S2). Using bioinformatics tools, we got candidate disease causing SNVs respectively; 1,225 (13.4%) SNVs via SIFT, 575 (6.2%) via LRT, 77 (0.8%) via MutationTaster, 1,005 (10.9%) via MutationAssessor, 867 (9.4%) via FATHMM, 893 (9.7%) via PROVEAN, 18 (0.1%) via MetaSVM, and 23 (0.2%) via MetaLR. By merging predicted candidate disease causing SNVs via at least one bioinformatic method, we obtained 2,761 SNVs (2,070 genes), mostly involved in Antigen Presentation functions (Supplementary Table S3).

## Table-S1. Reactome pathway results for candidate SNVs in InterVar.

| Pathway name | #Entities found | #Entities total | Entities pValue | Entities FDR |
| --- | --- | --- | --- | --- |
| Antigen Presentation: Folding, assembly and peptide loading of class I MHC | 35 | 102 | 1.11E-16 | 1.67E-15 |
| Endosomal/Vacuolar pathway | 35 | 82 | 1.11E-16 | 1.67E-15 |
| Class I MHC mediated antigen processing & presentation | 35 | 465 | 1.11E-16 | 1.67E-15 |
| ER-Phagosome pathway | 35 | 165 | 1.11E-16 | 1.67E-15 |
| Antigen processing-Cross presentation | 35 | 187 | 1.11E-16 | 1.67E-15 |
| Adaptive Immune System | 39 | 1003 | 1.11E-16 | 1.67E-15 |
| Interferon gamma signaling | 39 | 255 | 1.11E-16 | 1.67E-15 |
| Interferon alpha/beta signaling | 36 | 191 | 1.11E-16 | 1.67E-15 |
| Immunoregulatory interactions between a Lymphoid and a non-Lymphoid cell | 35 | 317 | 1.11E-16 | 1.67E-15 |
| Interferon Signaling | 39 | 401 | 1.11E-16 | 1.67E-15 |
| Cytokine Signaling in Immune system | 39 | 1108 | 1.11E-16 | 1.67E-15 |
| Immune System | 44 | 2713 | 3.36E-11 | 4.71E-10 |

## Table-S2. Reactome pathway results for uncertain SNVs in InterVar.

| Pathway name | #Entities found | #Entities total | Entities pValue | Entities FDR |
| --- | --- | --- | --- | --- |
| Formation of editosomes by ADAR proteins | 1 | 2 | 0.019241815 | 0.513563957 |
| mRNA Editing: A to I Conversion | 1 | 4 | 0.038115921 | 0.513563957 |
| C6 deamination of adenosine | 1 | 4 | 0.038115921 | 0.513563957 |
| NOSIP mediated eNOS trafficking | 1 | 7 | 0.065752858 | 0.513563957 |

## Table-S3. Reactome pathway results for candidate SNVs via bioinformatic tools

| Pathway name | #Entities found | #Entities total | Entities ratio | Entities pValue | Entities FDR |
| --- | --- | --- | --- | --- | --- |
| Antigen Presentation: Folding, assembly and peptide loading of class I MHC | 73 | 102 | 0.006928877 | 1.11E-16 | 6.44E-14 |
| Endosomal/Vacuolar pathway | 70 | 82 | 0.005570274 | 1.11E-16 | 6.44E-14 |
| Interferon gamma signaling | 109 | 255 | 0.017322193 | 1.11E-16 | 6.44E-14 |
| Interferon alpha/beta signaling | 87 | 191 | 0.012974662 | 4.44E-16 | 1.93E-13 |
| ER-Phagosome pathway | 78 | 165 | 0.011208478 | 2.00E-15 | 6.95E-13 |
| Antigen processing-Cross presentation | 81 | 187 | 0.012702941 | 5.52E-14 | 1.60E-11 |
| Interferon Signaling | 122 | 401 | 0.027239997 | 5.79E-10 | 1.44E-07 |
| Olfactory Signaling Pathway | 124 | 432 | 0.029345832 | 1.13E-08 | 2.45E-06 |
| Collagen chain trimerization | 27 | 44 | 0.002988927 | 1.84E-08 | 3.55E-06 |
| Immunoregulatory interactions between a Lymphoid and a non-Lymphoid cell | 97 | 317 | 0.021533863 | 2.56E-08 | 4.46E-06 |
| Assembly of collagen fibrils and other multimeric structures | 33 | 67 | 0.004551321 | 8.95E-08 | 1.41E-05 |
| Degradation of the extracellular matrix | 51 | 148 | 0.010053665 | 2.20E-06 | 3.19E-04 |
| Collagen degradation | 28 | 69 | 0.004687182 | 2.72E-05 | 0.003612407 |
| Extracellular matrix organization | 87 | 330 | 0.022416955 | 3.69E-05 | 0.004572273 |
| ECM proteoglycans | 30 | 79 | 0.005366483 | 4.73E-05 | 0.005483359 |
| Keratinization | 64 | 226 | 0.015352218 | 5.48E-05 | 0.0059151 |
| Collagen formation | 36 | 104 | 0.007064737 | 5.80E-05 | 0.0059151 |
| NCAM1 interactions | 19 | 44 | 0.002988927 | 2.33E-04 | 0.022386874 |
| Collagen biosynthesis and modifying enzymes | 27 | 76 | 0.005162693 | 3.08E-04 | 0.027998098 |
| Laminin interactions | 15 | 31 | 0.002105835 | 3.22E-04 | 0.027998098 |
| G alpha (s) signaling events | 136 | 602 | 0.040893961 | 3.48E-04 | 0.028559345 |
| MET activates PTK2 signaling | 15 | 32 | 0.002173765 | 4.45E-04 | 0.035156508 |
